# Supplementary material
Source: publisher figshare collection journal article supplement (https://acs.figshare.com/ndownloader/files/15176726)

# **Disulfide Catalyzed Iodination of Electron-rich Aromatic Compounds**

Keisuke Iida,<sup>\*,†</sup> Shunsuke Ishida,<sup>†</sup> Takamichi Watanabe,<sup>‡</sup> and Takayoshi Arai<sup>\*,†</sup>

<sup>†</sup> Soft Molecular Activation Research Center (SMARC), Chiba Iodine Resource Innovation Center (CIRIC), Molecular Chirality Research Center (MCRC), and Department of Chemistry, Graduate School of Science, Chiba University, 1-33 Yayoi, Inage, Chiba 263-8522, Japan.

<sup>‡</sup> Nippoh Chemicals Co., Ltd. Neo Kawai Bldg., 8-15, 4-Chome, Nihonbashi-Honchou, Chuo-Ku, Tokyo 103-0023, Japan

## Supporting information

### Contents

|                                                 |    |
|-------------------------------------------------|----|
| 1. Mechanistic study                            | S3 |
| 2. $^1\text{H}$ and $^{13}\text{C}$ NMR spectra | S8 |

## Mechanistic study

### Reactivity of thiosulfonate **4** and in *N*-sulfenyl hydantoin derivatives **5-7**<sup>a</sup>

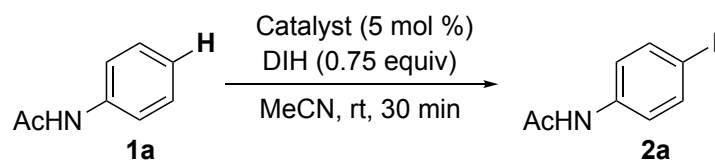

| entry | Catalyst | yield <sup>a</sup> (%) |
|-------|----------|------------------------|
| 1     | <b>4</b> | 8                      |
| 2     | <b>5</b> | 10                     |
| 3     | <b>6</b> | 8                      |
| 4     | <b>7</b> | 15                     |

<sup>a</sup>Reaction were carried out with **1a** (0.3 mmol), and catalyst (5 mol %) in solvent (1 mL) for 30 min at rt. <sup>b</sup>Yield was determined by <sup>1</sup>H NMR analysis using 1,3,5-trimethoxybenzene as an internal standard.

**A control experiment in the presence of radical quencher<sup>a</sup>**

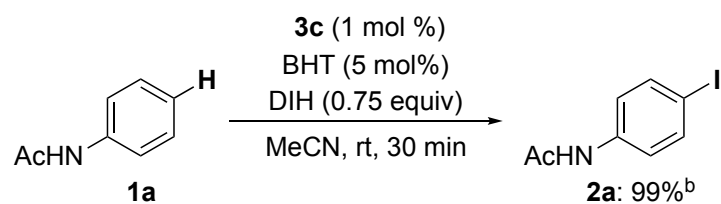

<sup>a</sup>Reaction were carried out with **1a** (0.3 mmol), and catalyst (5 mol %) in solvent (1 mL) for 30 min at rt. <sup>b</sup>Yield was determined by <sup>1</sup>H NMR analysis using 1,3,5-trimethoxybenzene as an internal standard.



## NMR experiment for **3c** and DIH

To a solution of **3c** (0.1 mmol) in acetonitrile- $d_3$  (0.75 mL) was added DIH (0.1 mmol) at room temperature. After 30 min and 2 h,  $^1\text{H}$  NMR spectra were measured at room temperature.

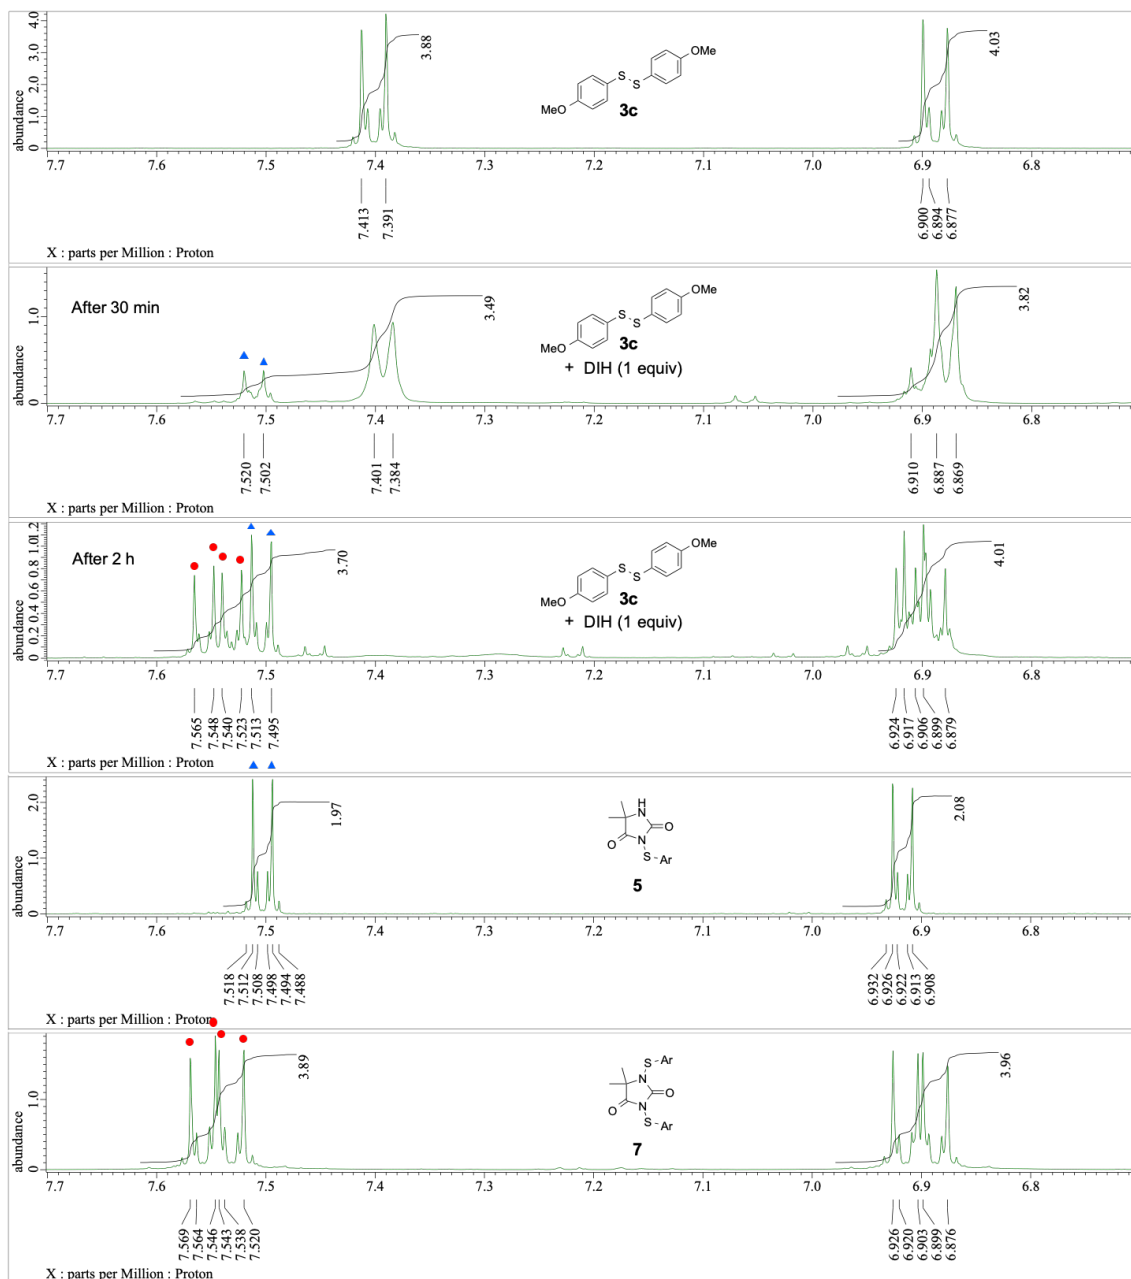

**Figure S1.**  $^1\text{H}$  NMR spectra of **3c** in acetonitrile- $d_3$  following the addition of DIH.

After 30 min, proton peaks of **5** gradually appeared. After 2 h, proton peaks of **3c** were completely disappeared, and proton peaks of **5** and **7** were only observed.

## NMR experiment for **3c** (or 4-methoxythiophenol) and DCDMH

To a solution of **3c** (0.1 mmol) or 4-methoxythiophenol (0.2 mmol) in acetonitrile- $d_3$  (0.75 mL) was added DCDMH (0.1 mmol) at room temperature. After 30 min,  $^1\text{H}$  NMR spectra were measured at room temperature.

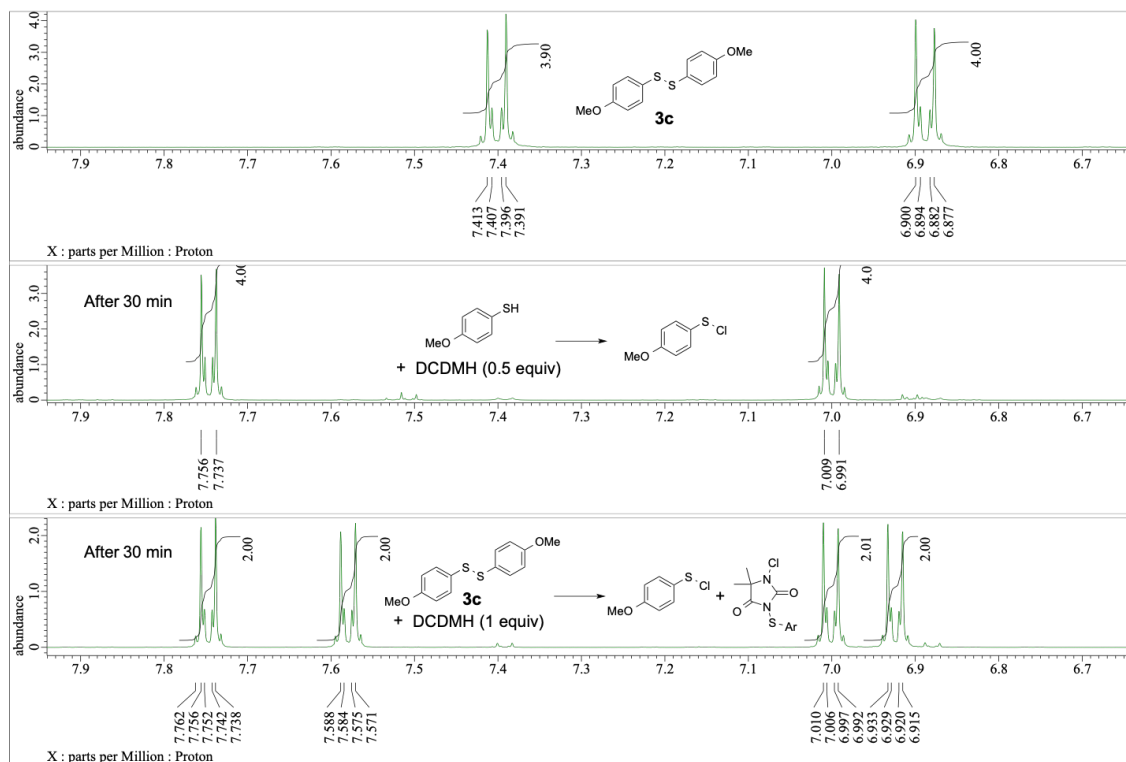

**Figure S2.**  $^1\text{H}$  NMR spectra of 4-methoxythiophenol or **3c** in acetonitrile- $d_3$  following the addition of DCDMH.

In case of 4-methoxythiophenol, proton peaks of **3c** were completely disappeared, and proton peaks of corresponding sulfonyl chloride were only observed. Whereas, mixture of **3c** and DCDMH gave corresponding sulfonyl chloride and *N*-sulfonyl hydantoin at a ratio of 1:1.

### NMR experiment for **3c** and ICl (or selectfluor)

To a solution of **3a** (0.1 mmol) in acetonitrile- $d_3$  (0.75 mL) was added ICl (0.1 mmol) or selectfluor (0.05 mmol) at room temperature. After 30 min,  $^1\text{H}$  NMR spectra were measured at room temperature.

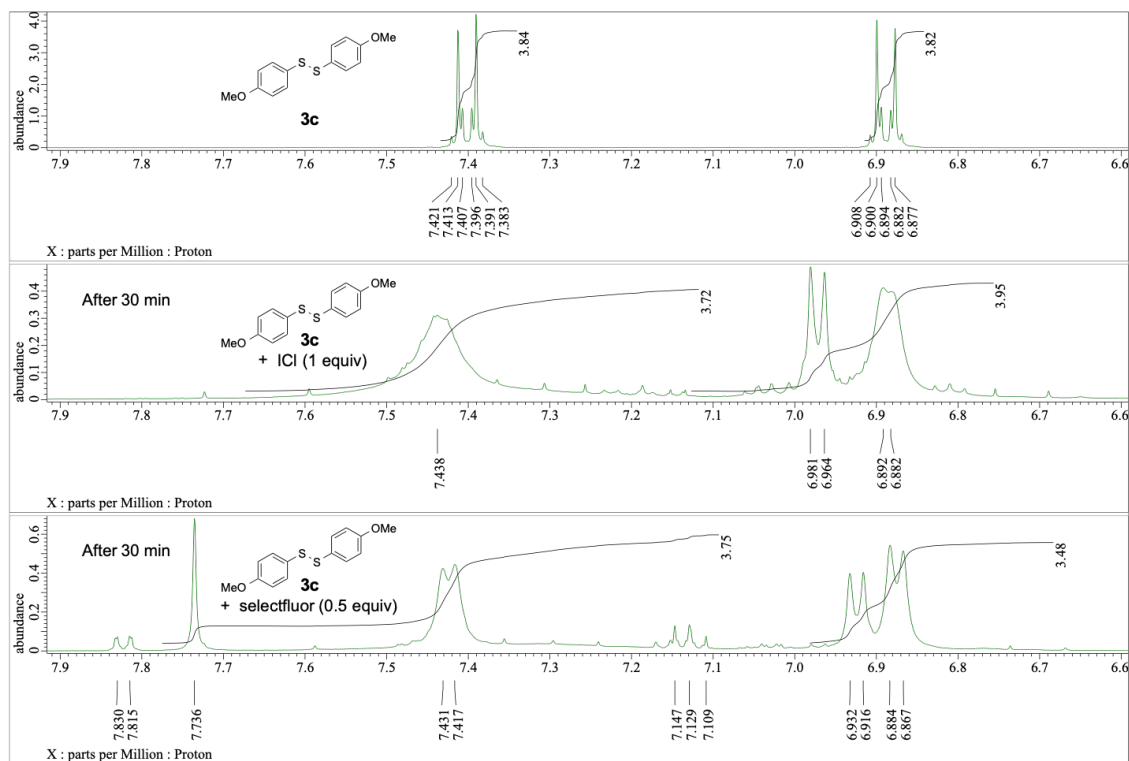

**Figure S3.**  $^1\text{H}$  NMR spectra of **3c** in acetonitrile- $d_3$  following the addition of ICl or selectfluor.

In both case, proton peaks of **3c** were broadened and slightly downfield shifted, and new peaks were observed. Considering disulfide **3c** and selectfluor previously gave halogen adduct, this indicate disulfide **3c** partially reacted with ICl, and formed transient halogen-bonding adduct.

**$^1\text{H}$ -NMR and  $^{13}\text{C}$ -NMR spectra**

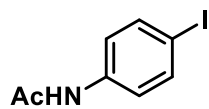

**2a**

$^1\text{H}$  NMR, (400 MHz,  $\text{DMSO}-d_6$ )

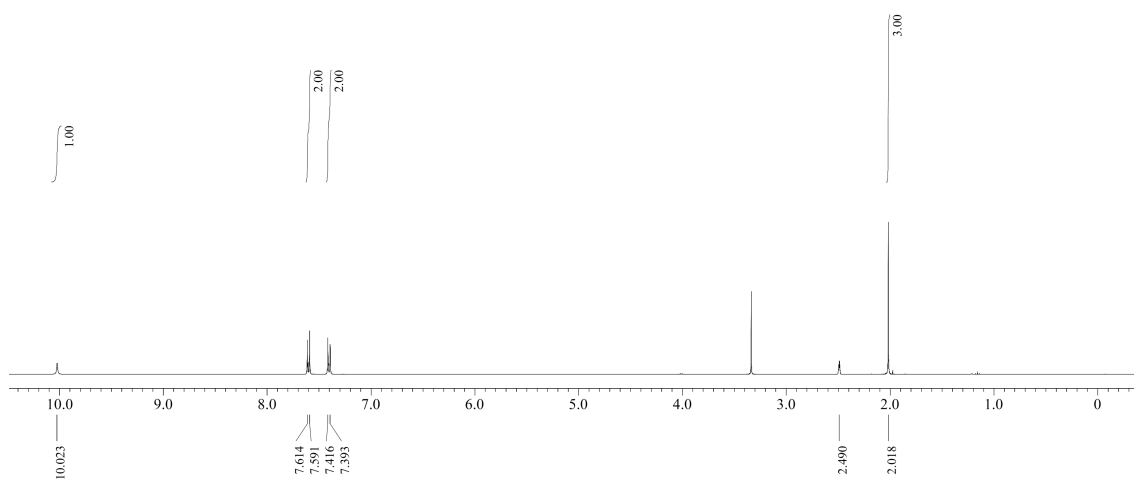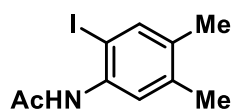

**2b**

$^1\text{H}$  NMR, (400 MHz,  $\text{CDCl}_3$ )

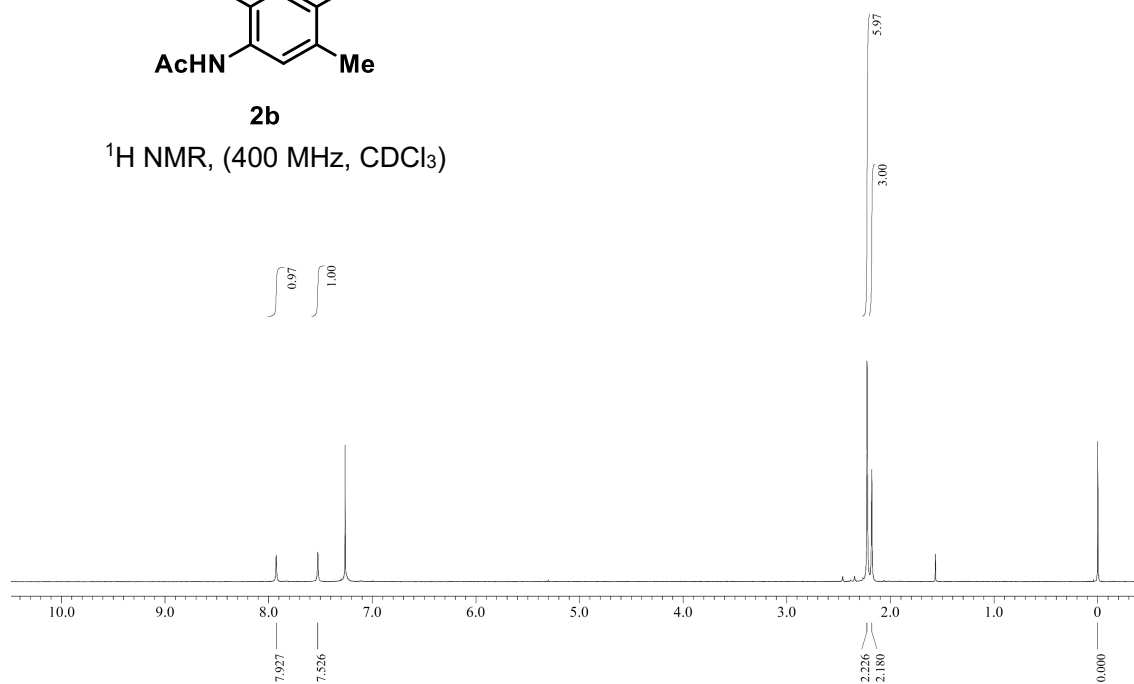

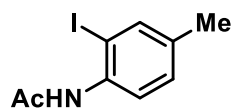

**2c**

$^1\text{H}$  NMR, (400 MHz,  $\text{CDCl}_3$ )

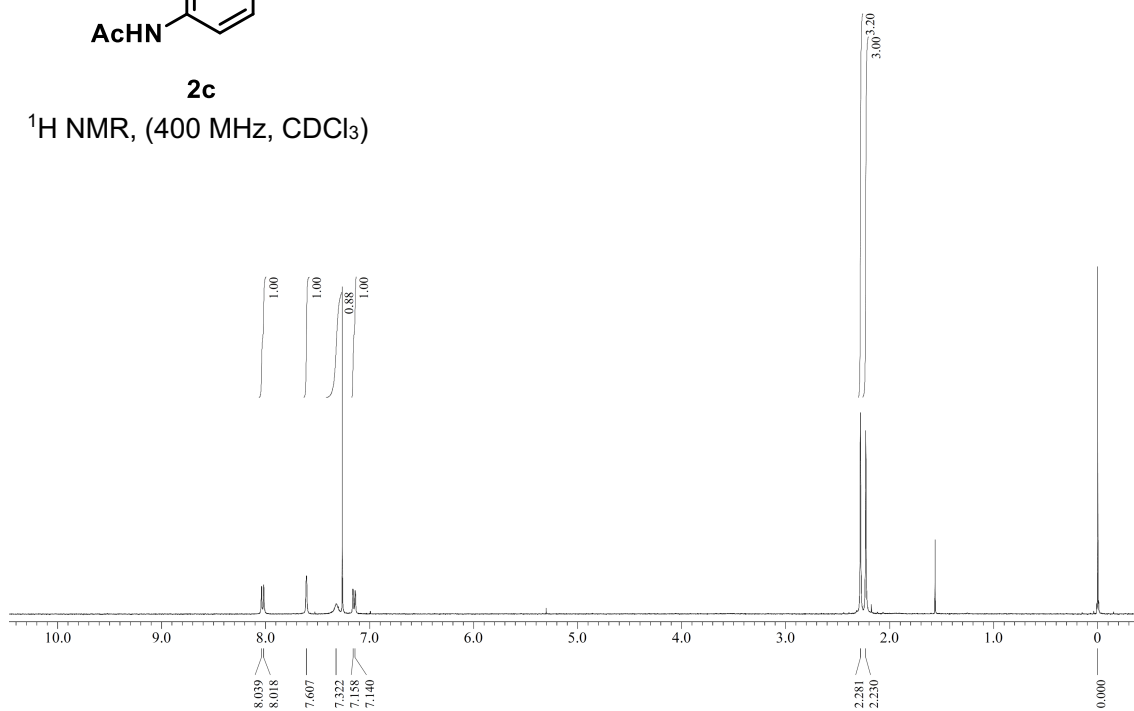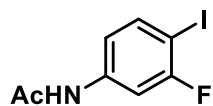

**2d**

$^1\text{H}$  NMR, (500 MHz,  $\text{DMSO}-d_6$ )

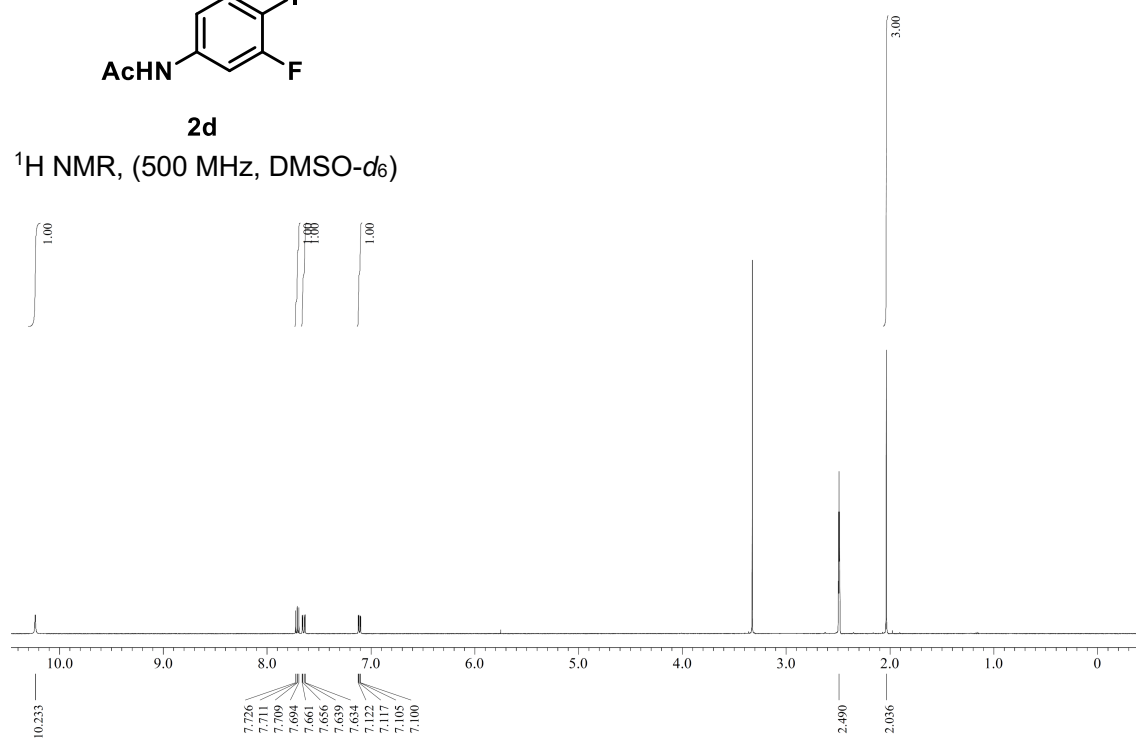

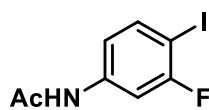

**2d**

$^{13}\text{C}$  NMR, (100 MHz, DMSO- $d_6$ )

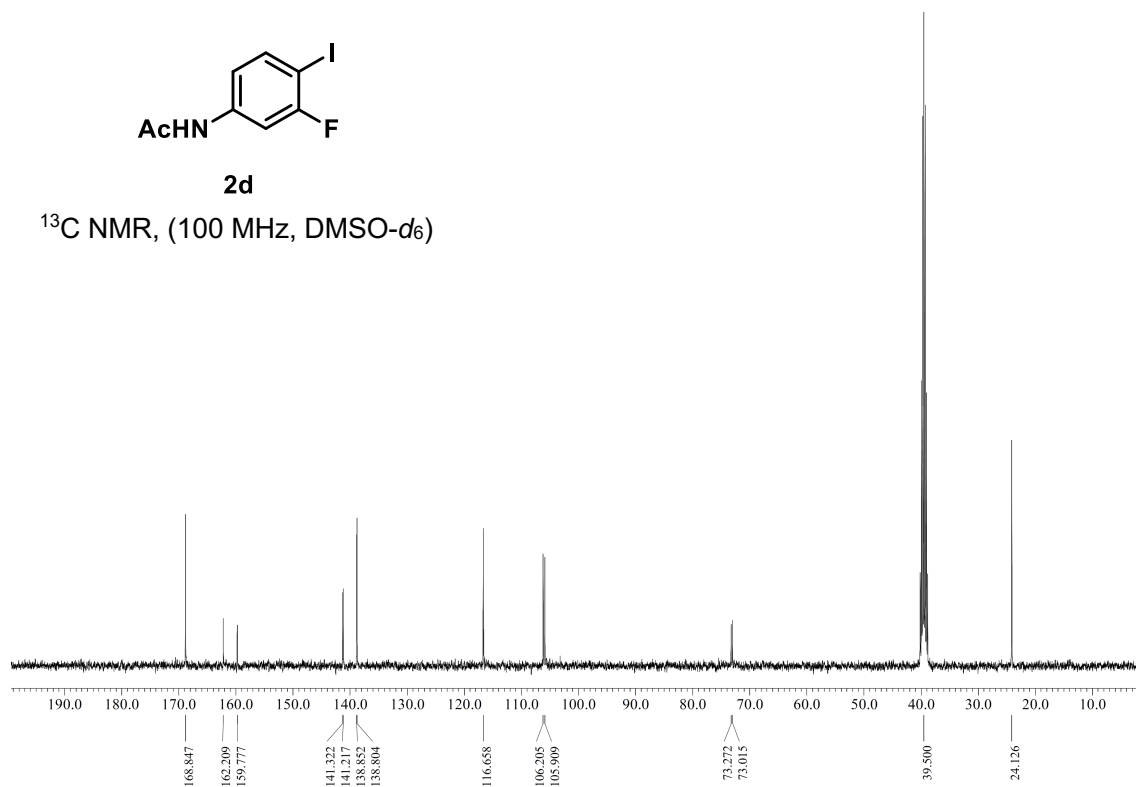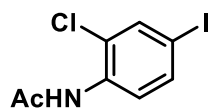

**2e**

$^1\text{H}$  NMR, (400 MHz,  $\text{CDCl}_3$ )

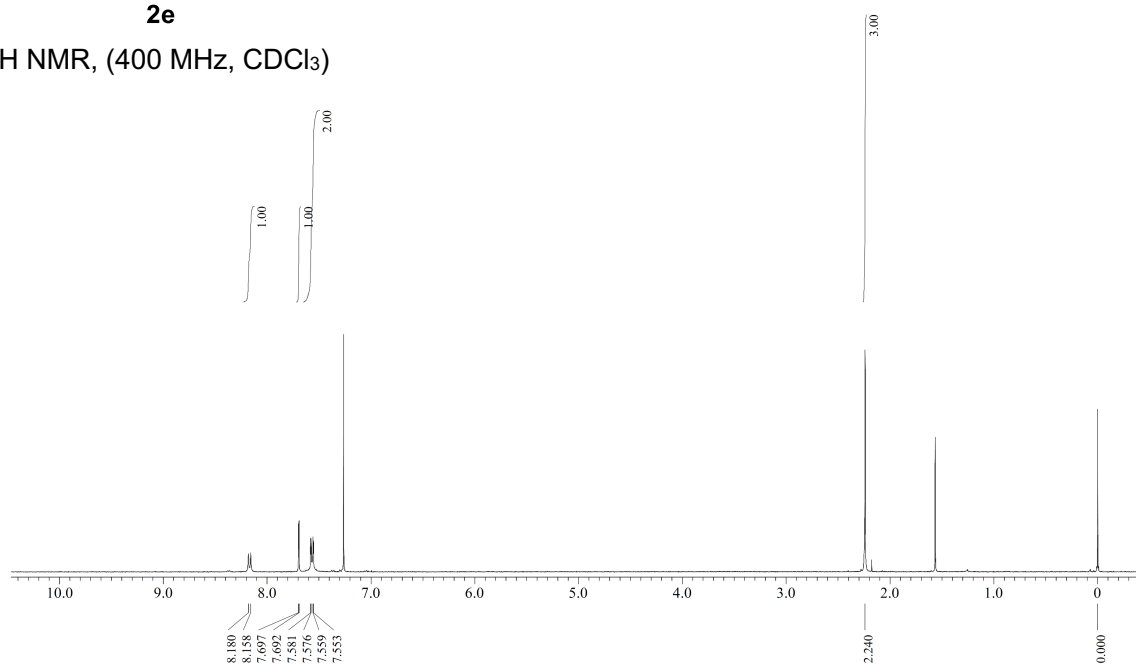

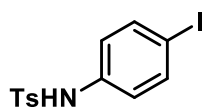

**2f**

$^1\text{H}$  NMR, (400 MHz,  $\text{CDCl}_3$ )

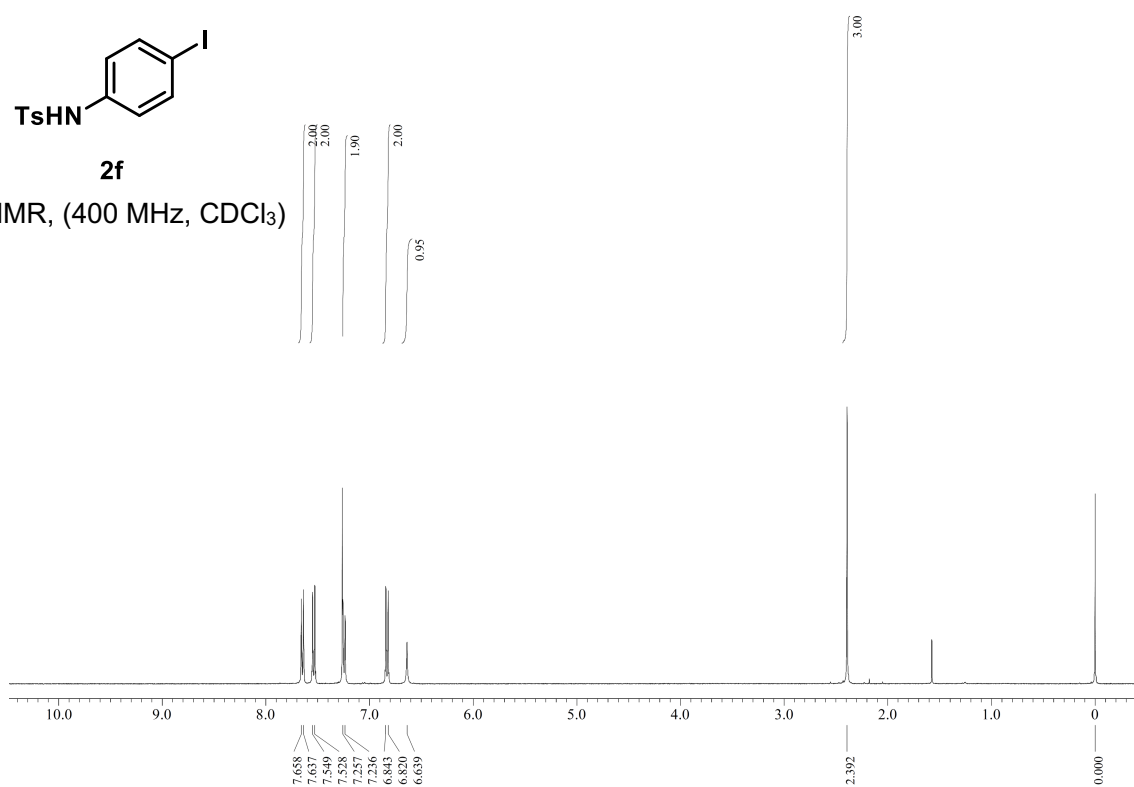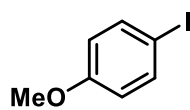

**2g**

$^1\text{H}$  NMR, (500 MHz,  $\text{CDCl}_3$ )

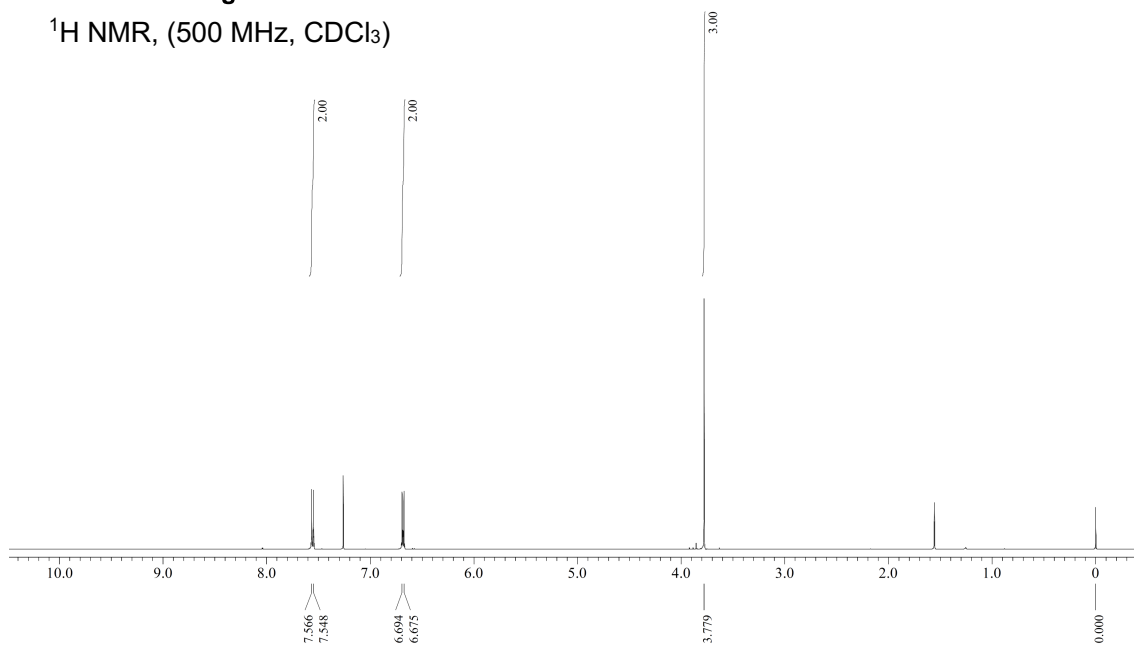

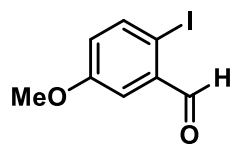

**2h**

$^1\text{H}$  NMR, (500 MHz,  $\text{CDCl}_3$ )

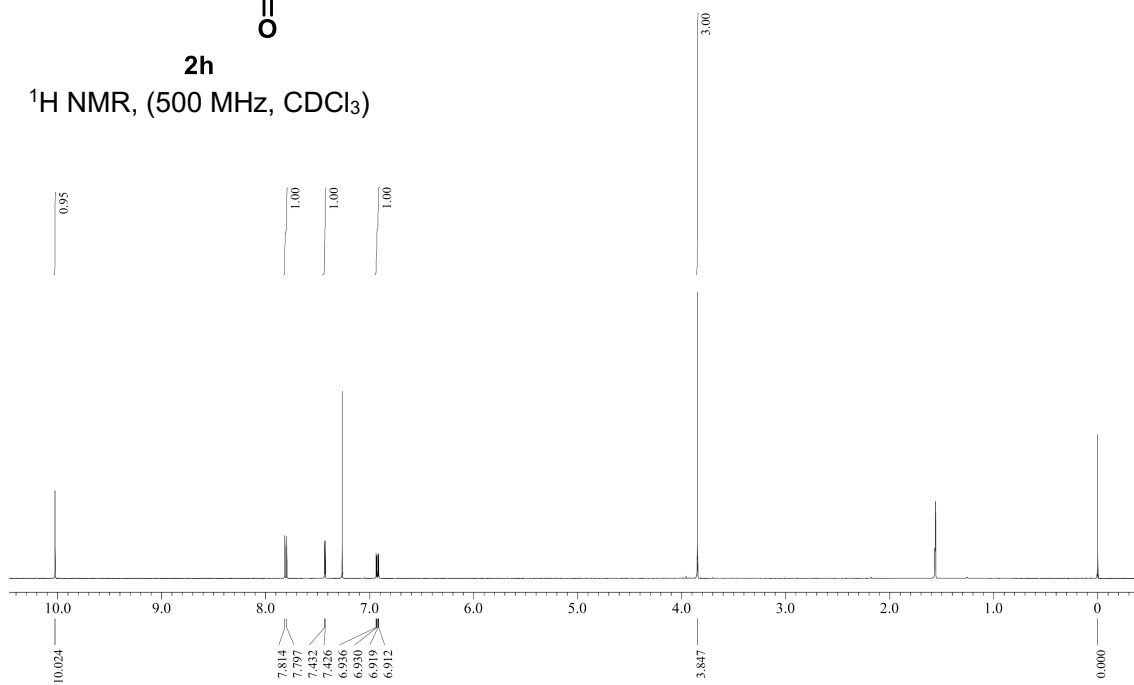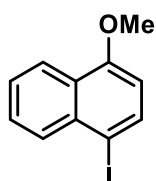

**2i**

$^1\text{H}$  NMR, (500 MHz,  $\text{CDCl}_3$ )

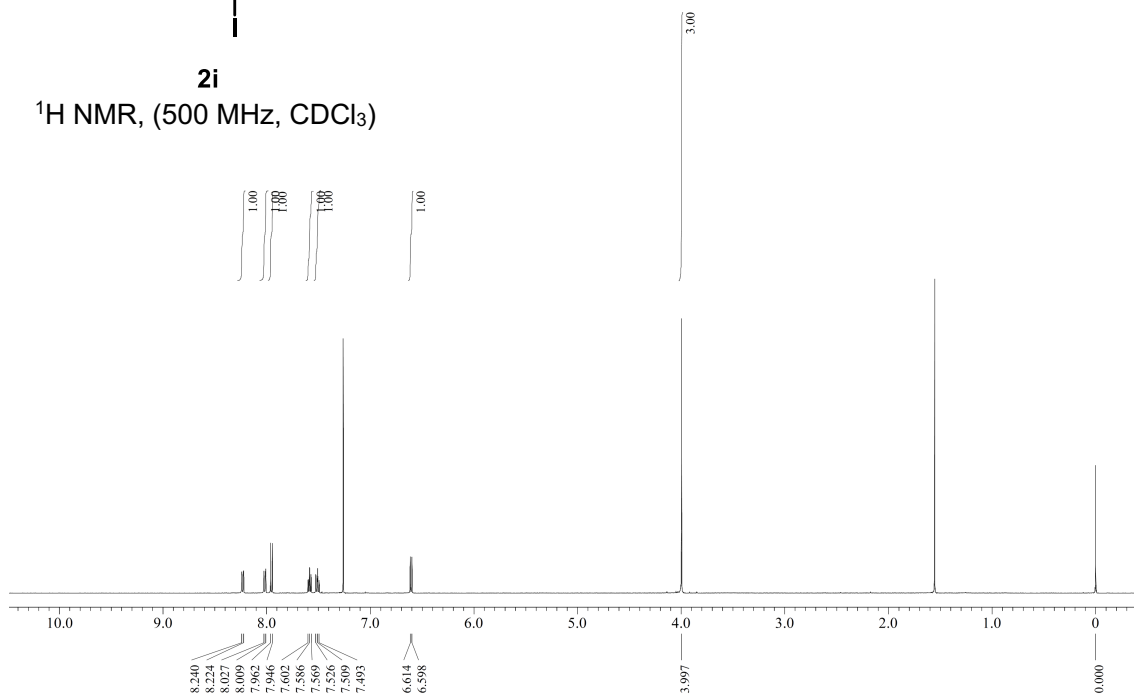



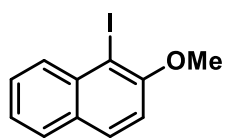

**2j**

$^1\text{H}$  NMR, (500 MHz,  $\text{CDCl}_3$ )

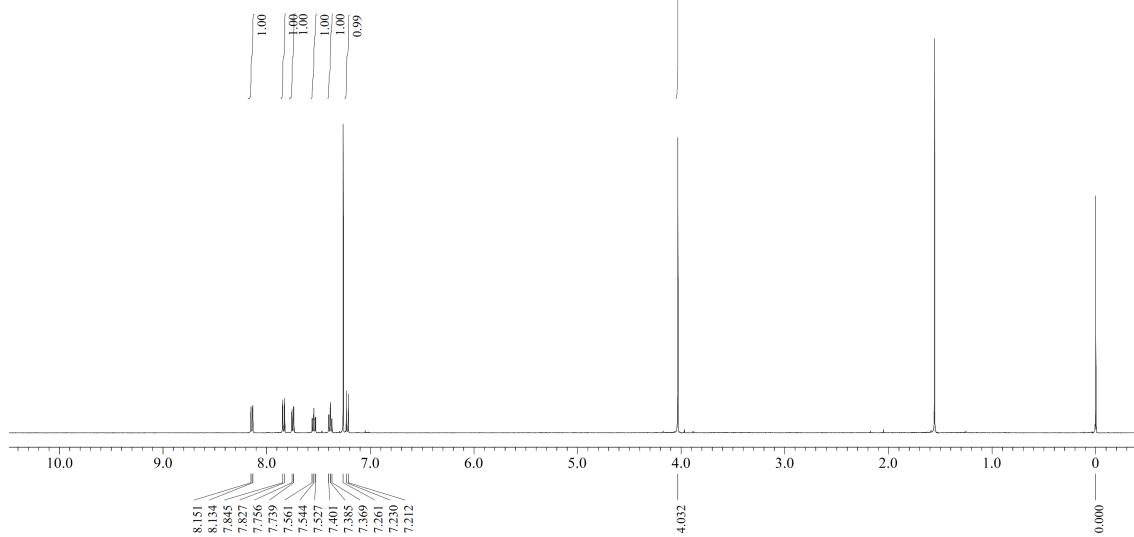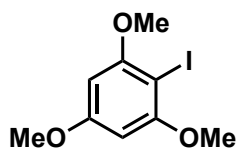

**2k**

$^1\text{H}$  NMR, (500 MHz,  $\text{CDCl}_3$ )

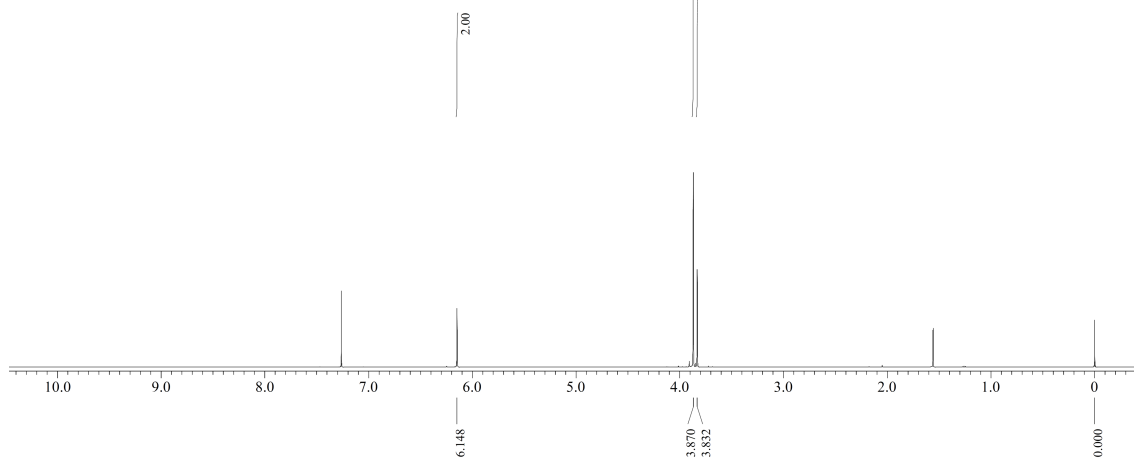

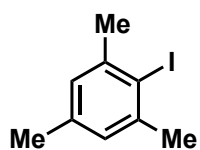

**2l**

$^1\text{H}$  NMR, (500 MHz,  $\text{CDCl}_3$ )

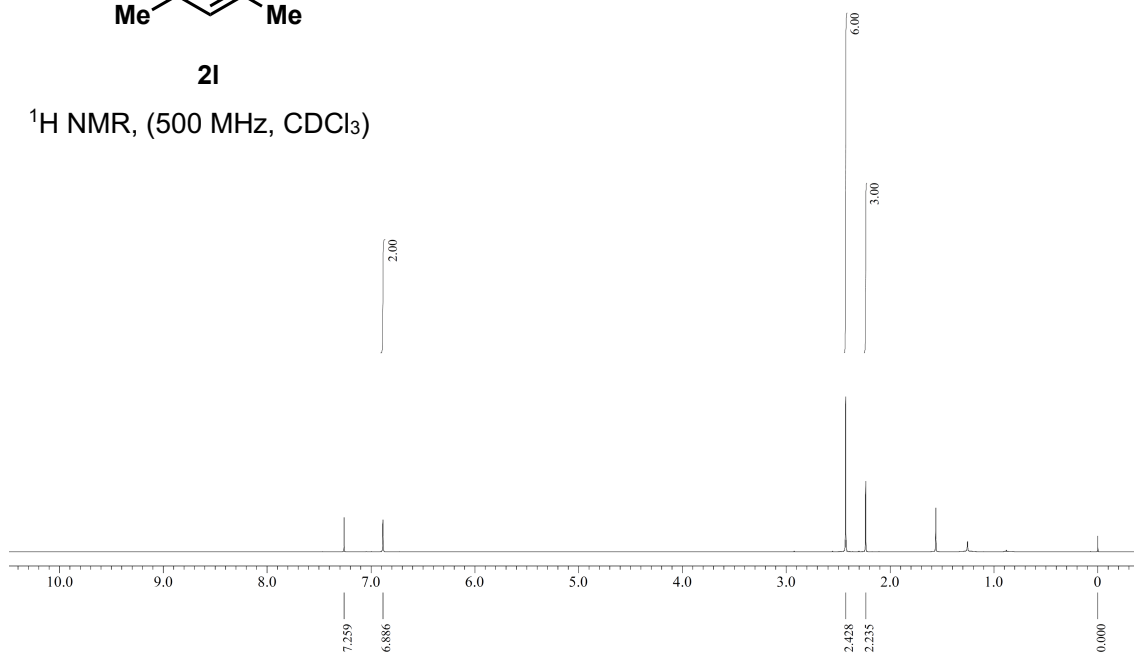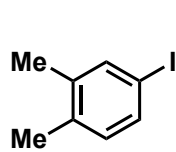

**2m**

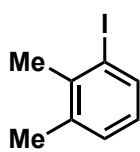

**2m'**

$^1\text{H}$  NMR, (400 MHz,  $\text{CDCl}_3$ )

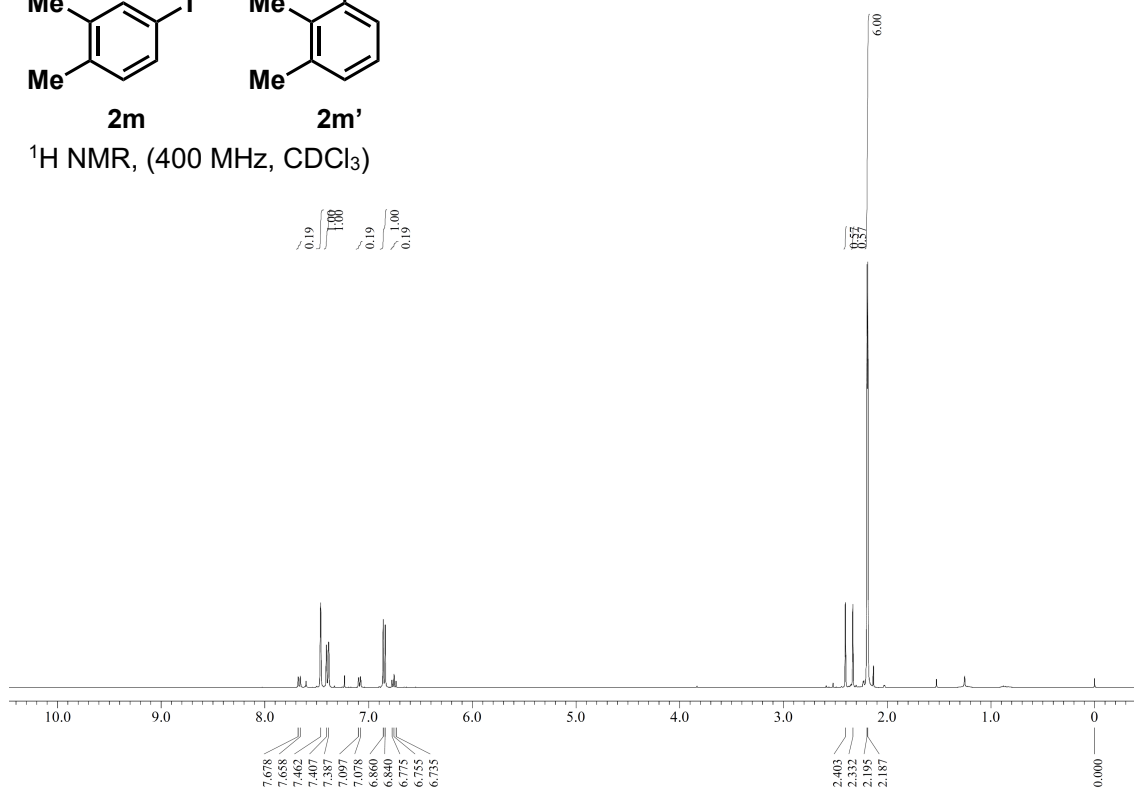

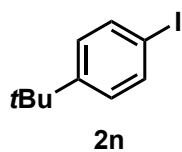

$^1\text{H}$  NMR, (400 MHz,  $\text{CDCl}_3$ )

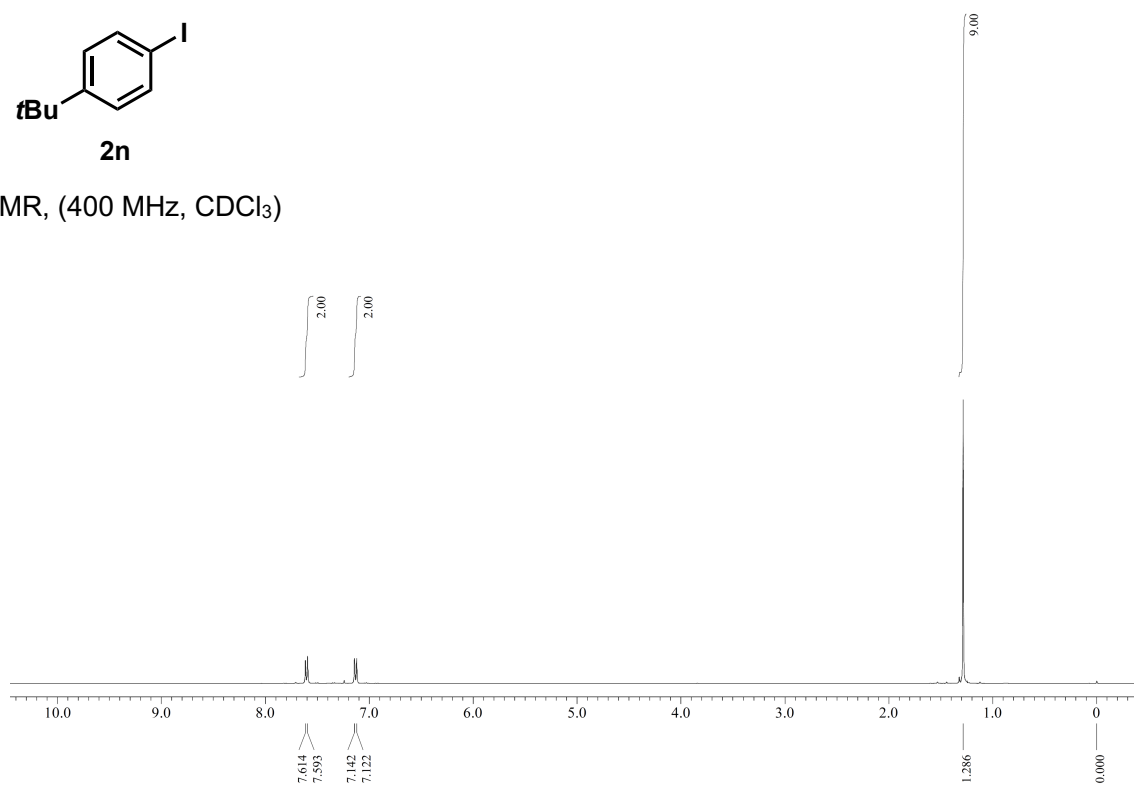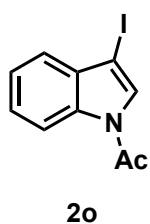

$^1\text{H}$  NMR, (500 MHz,  $\text{CDCl}_3$ )

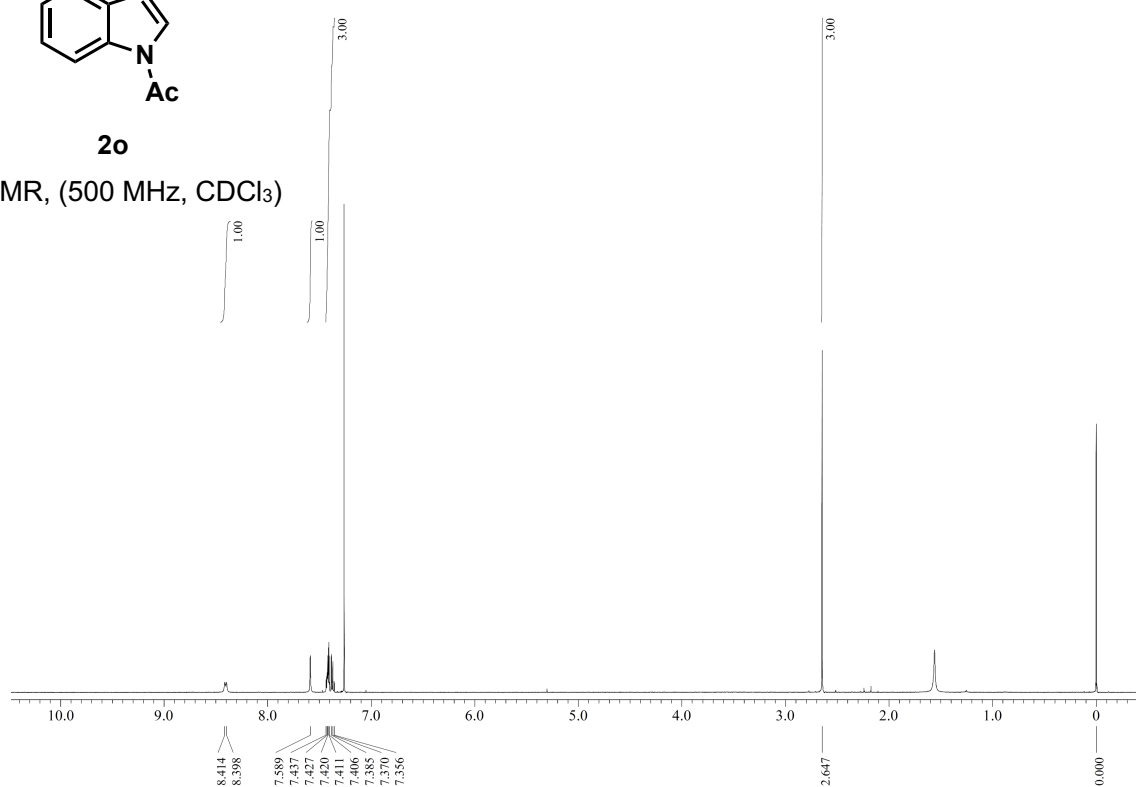

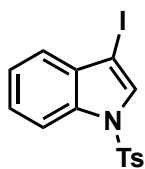

**2p**

$^1\text{H}$  NMR, (500 MHz,  $\text{CDCl}_3$ )

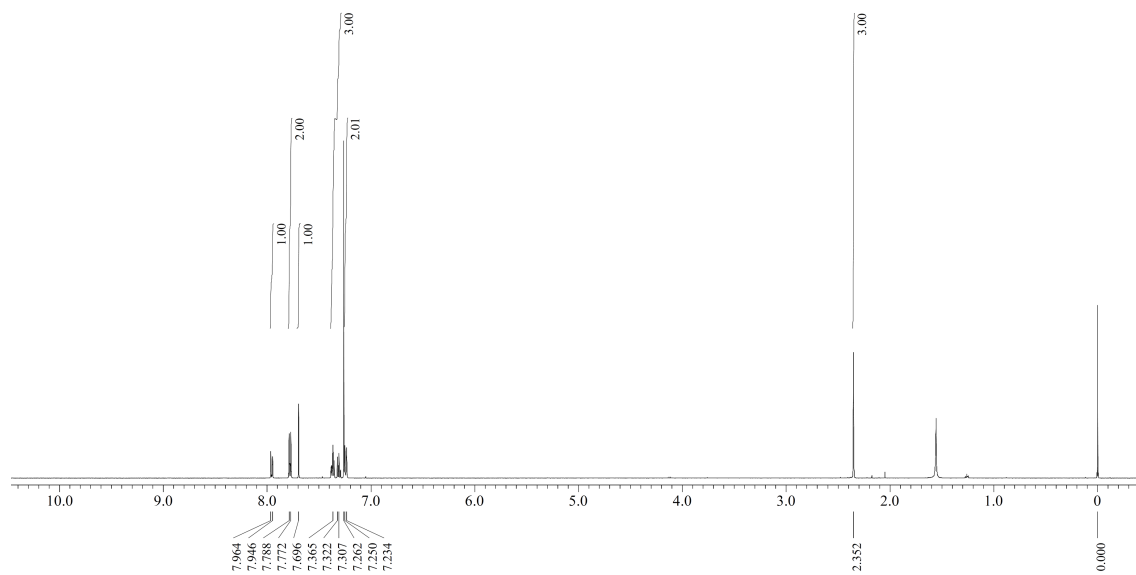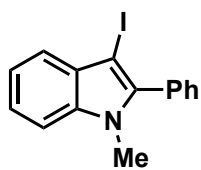

**2q**

$^1\text{H}$  NMR, (500 MHz,  $\text{CDCl}_3$ )

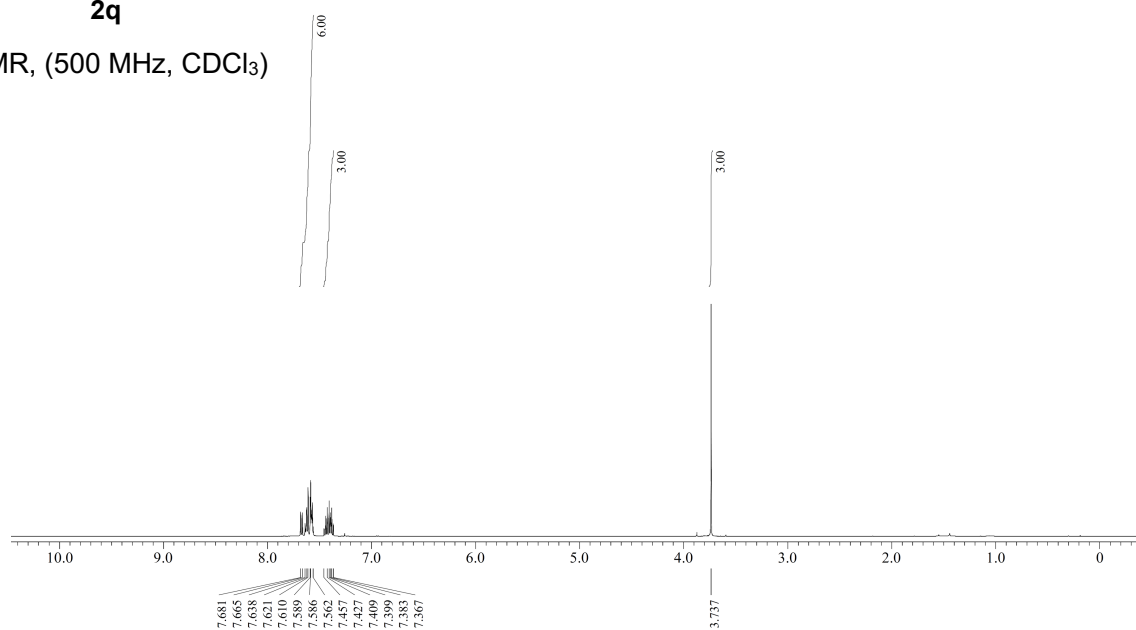

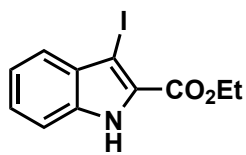

**2r**

<sup>1</sup>H NMR, (500 MHz, CDCl<sub>3</sub>)

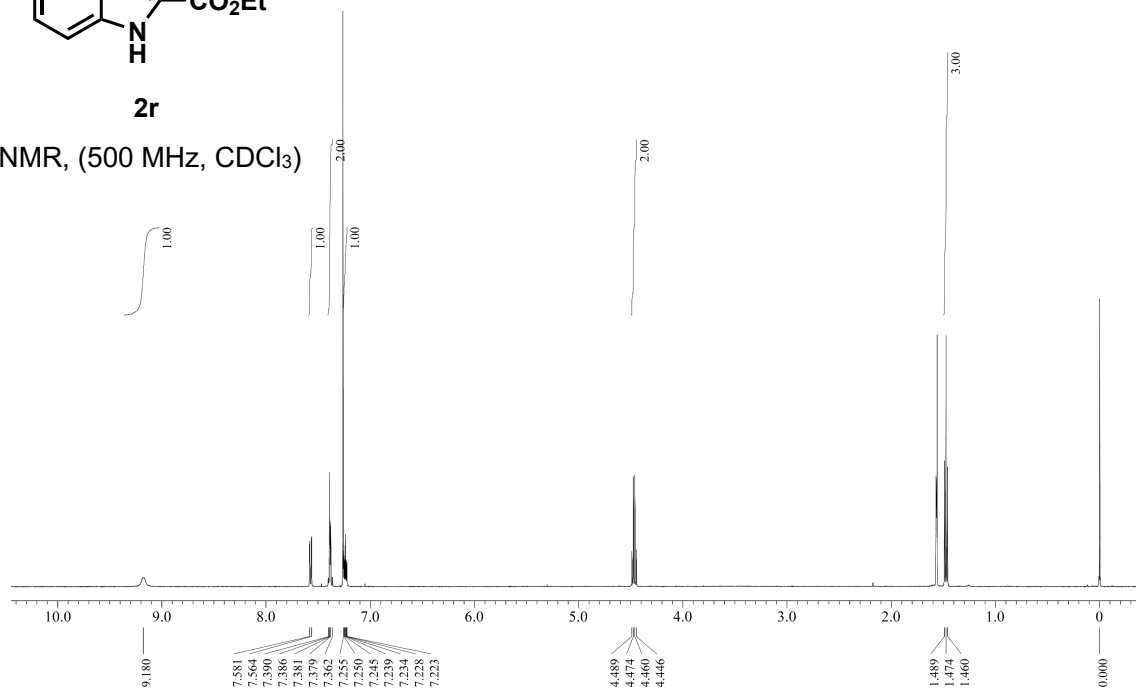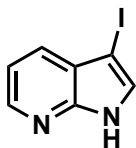

**2s**

<sup>1</sup>H NMR, (500 MHz, CDCl<sub>3</sub>)

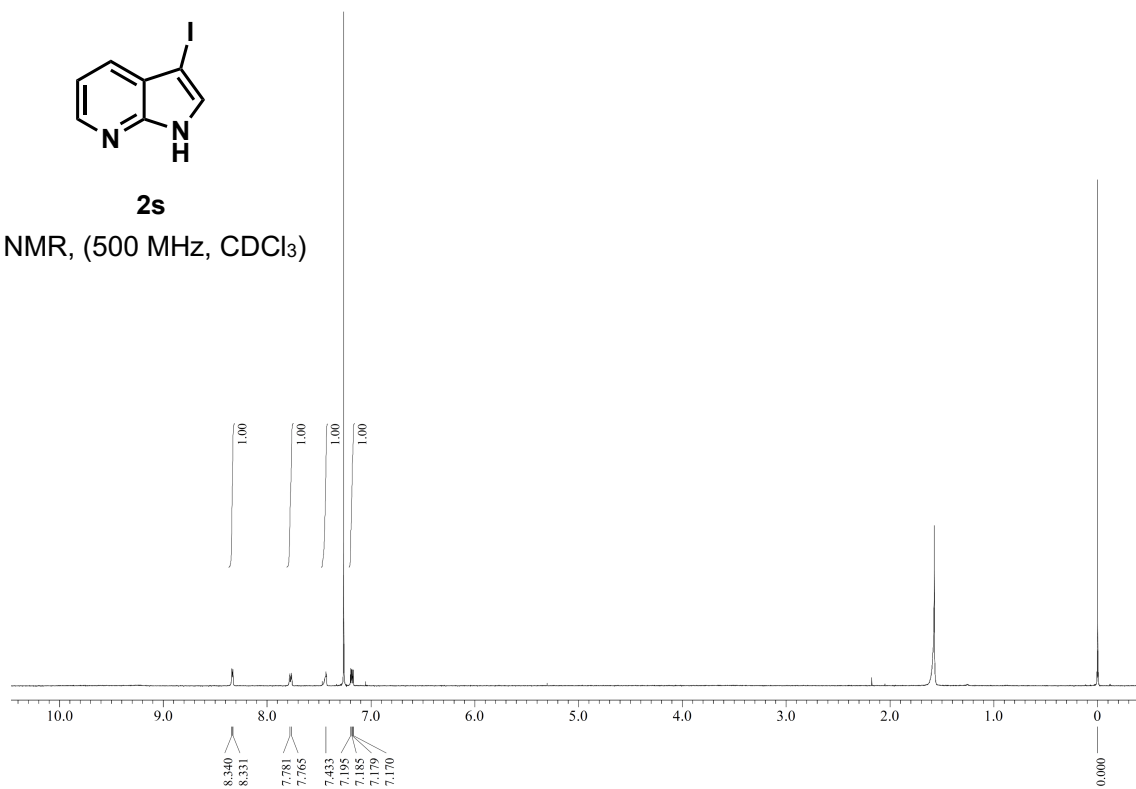

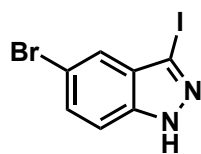

**2t**

$^1\text{H}$  NMR, (400 MHz, DMSO- $d_6$ )

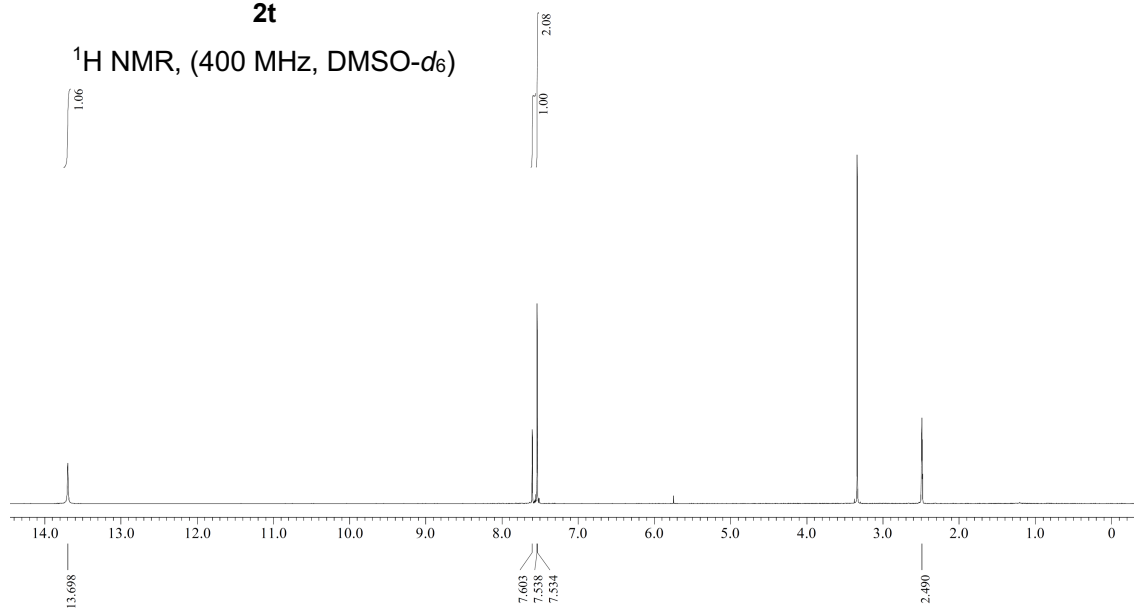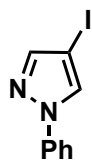

**2u**

$^1\text{H}$  NMR, (500 MHz,  $\text{CDCl}_3$ )

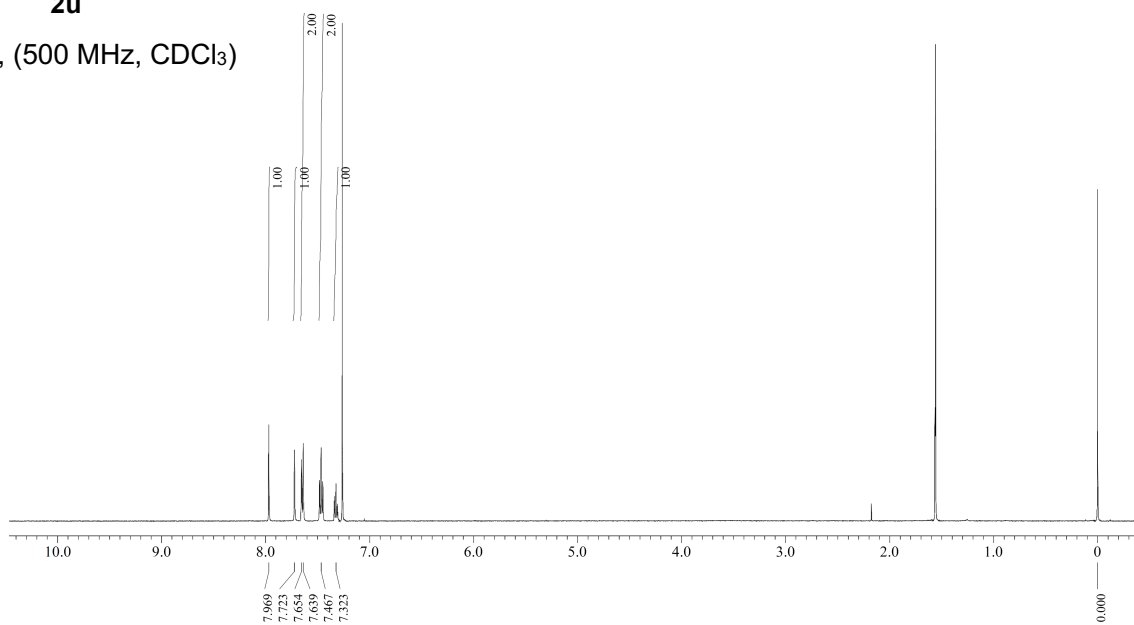

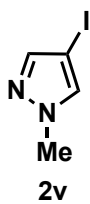

<sup>1</sup>H NMR, (500 MHz, CDCl<sub>3</sub>)

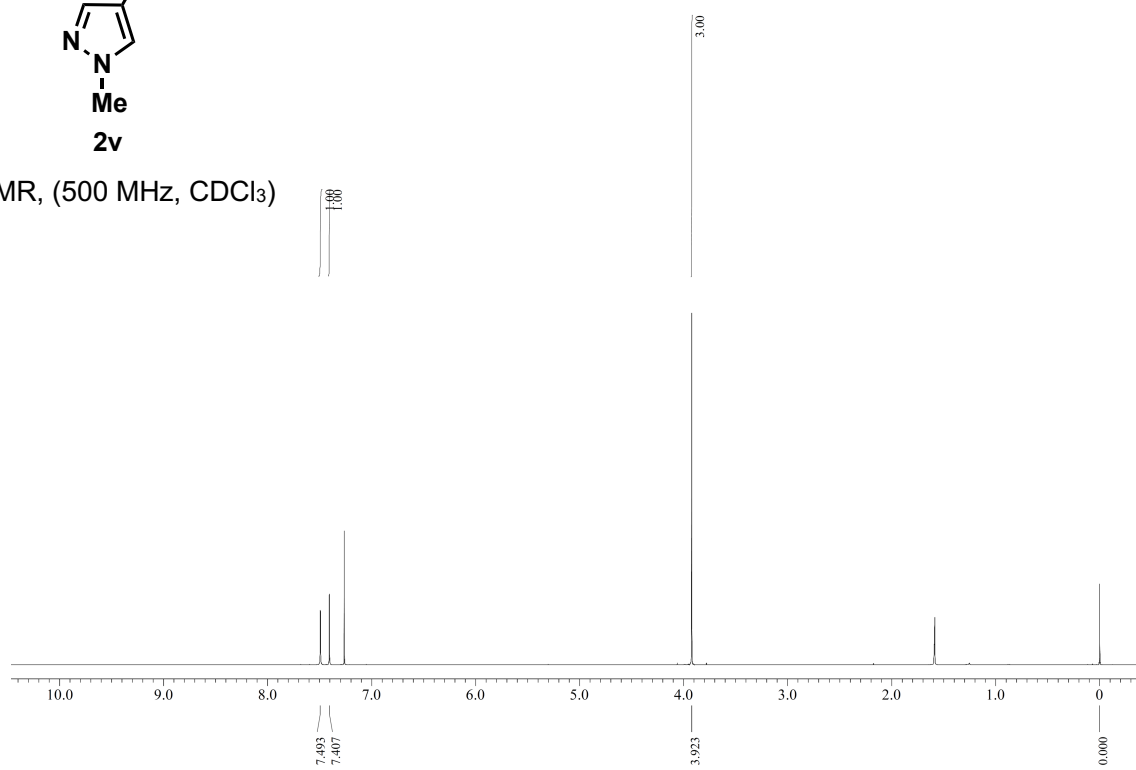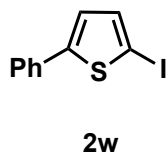

<sup>1</sup>H NMR, (500 MHz, CDCl<sub>3</sub>)

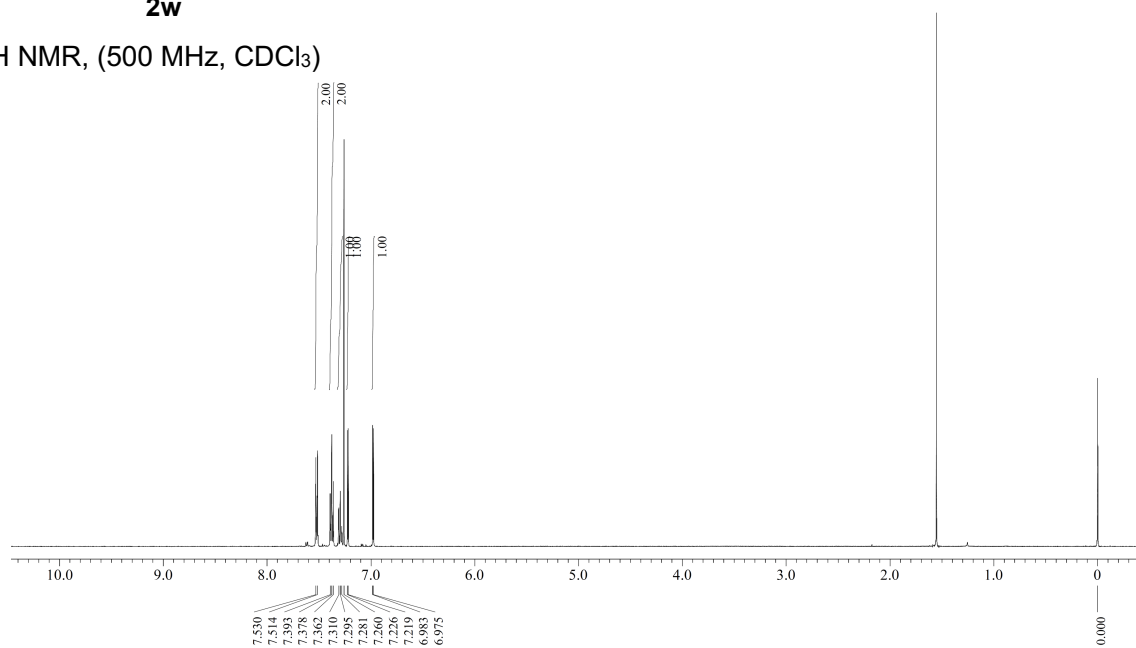

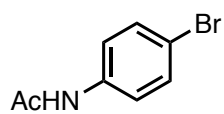

**2x**

$^1\text{H}$  NMR, (400 MHz,  $\text{CDCl}_3$ )

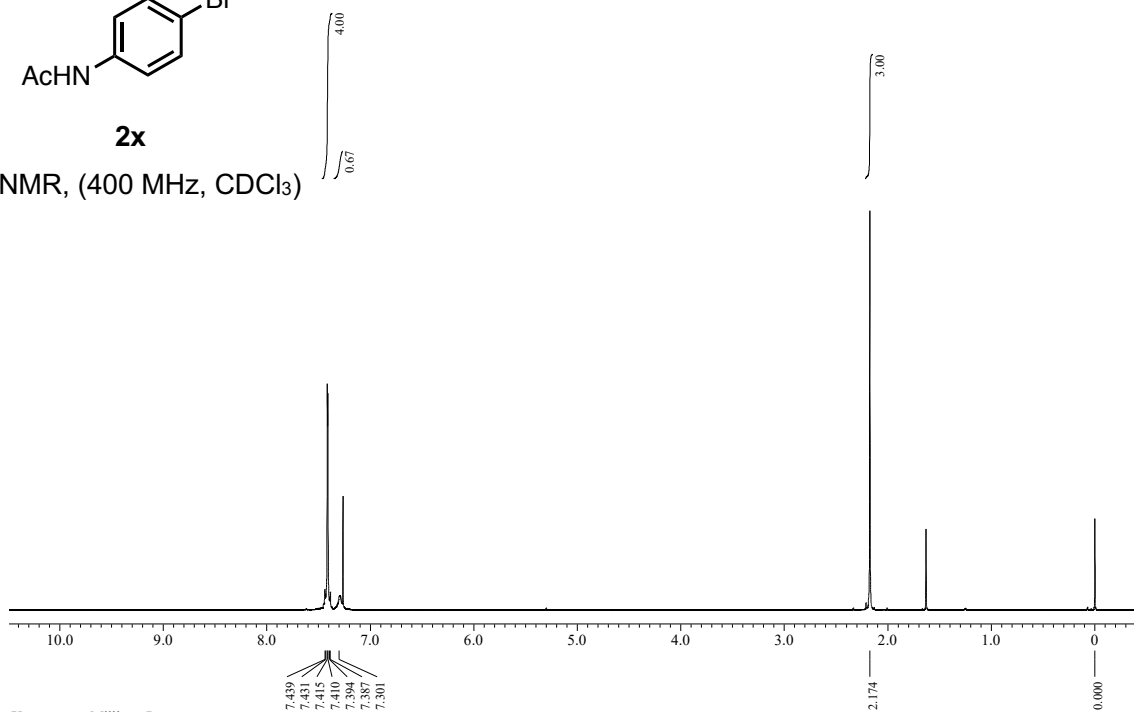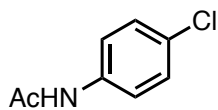

**2y**

$^1\text{H}$  NMR, (400 MHz,  $\text{CDCl}_3$ )

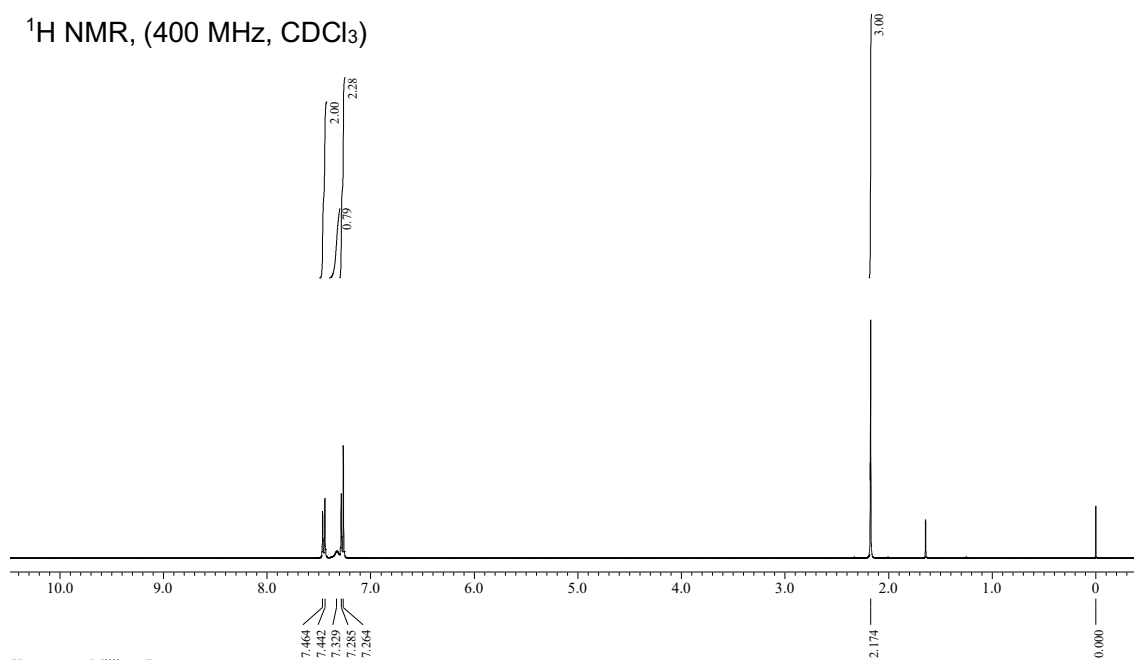



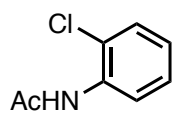

**2y'**

<sup>1</sup>H NMR, (400 MHz, CDCl<sub>3</sub>)

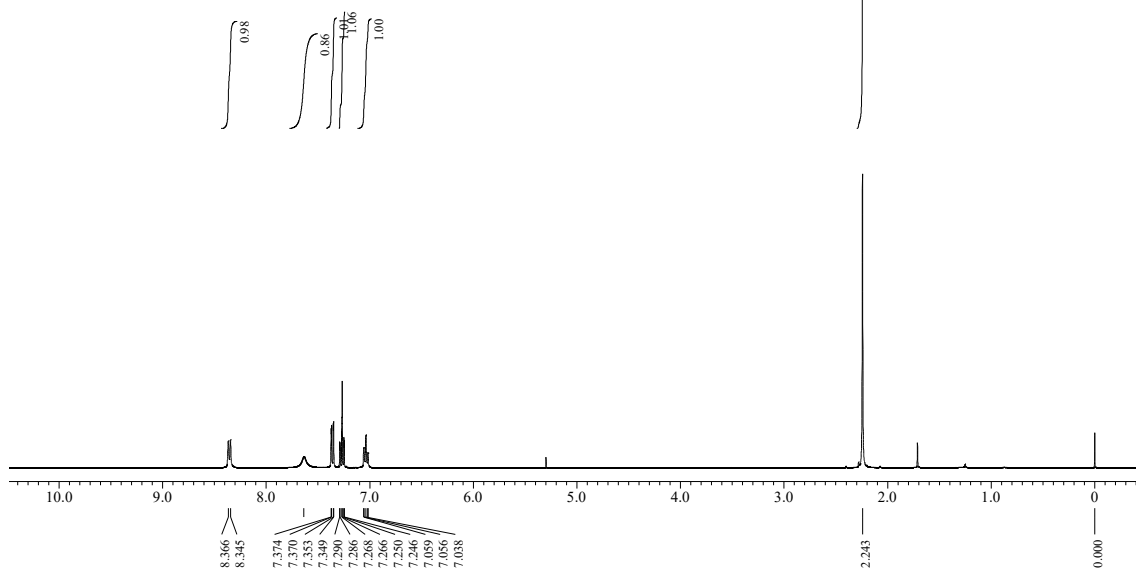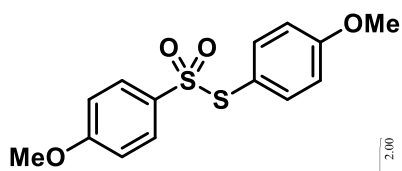

**4**

<sup>1</sup>H NMR, (500 MHz, CDCl<sub>3</sub>)

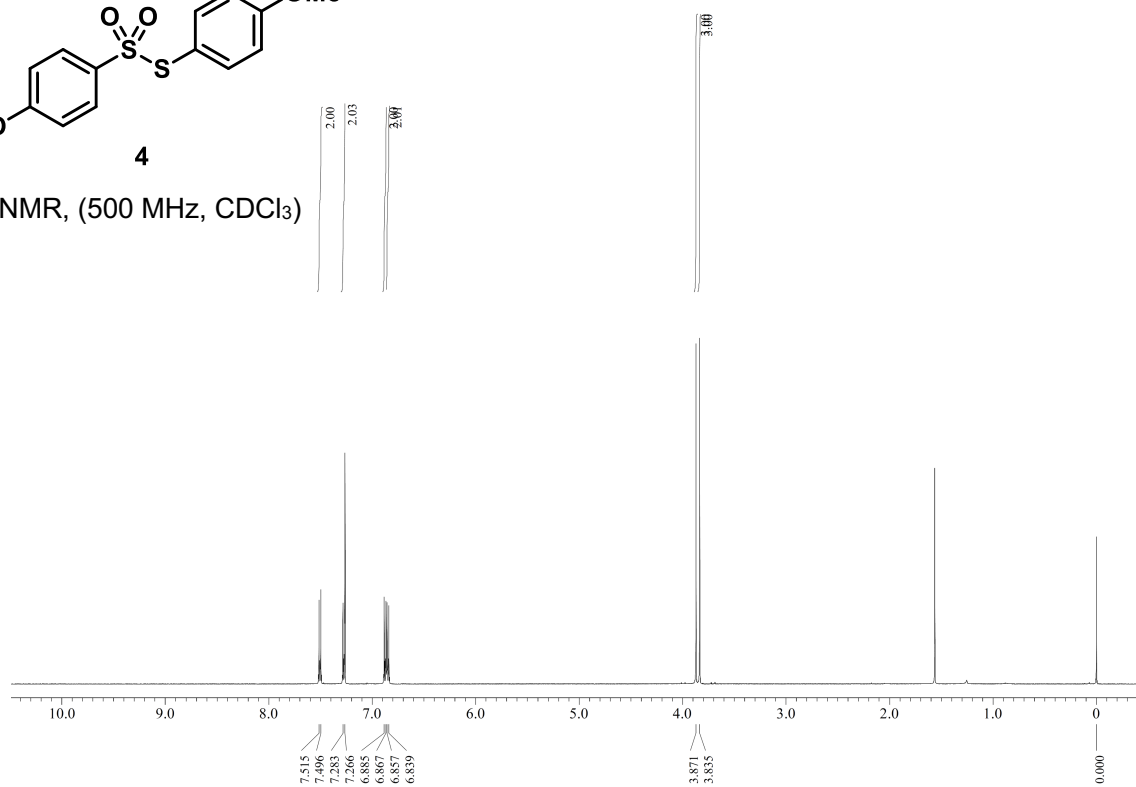

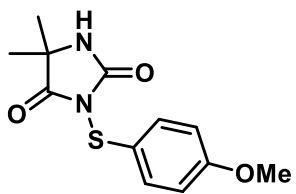

**5**

$^1\text{H}$  NMR, (500 MHz,  $\text{CDCl}_3$ )

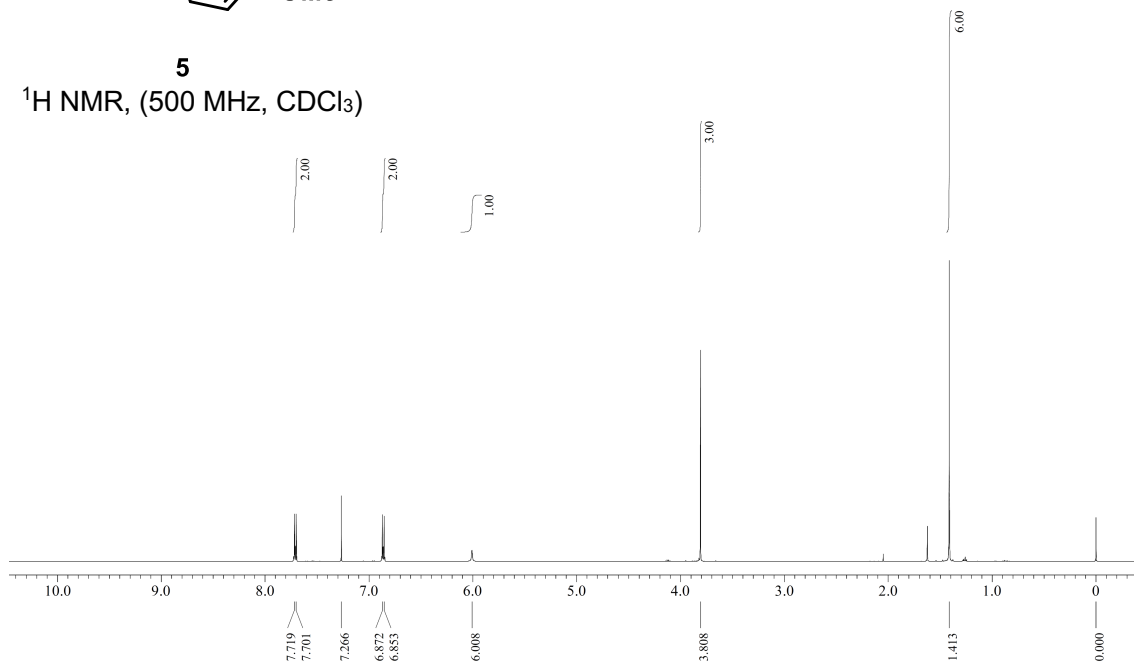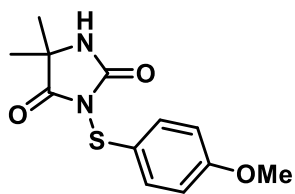

**5**

$^{13}\text{C}$  NMR, (125 MHz,  $\text{CDCl}_3$ )

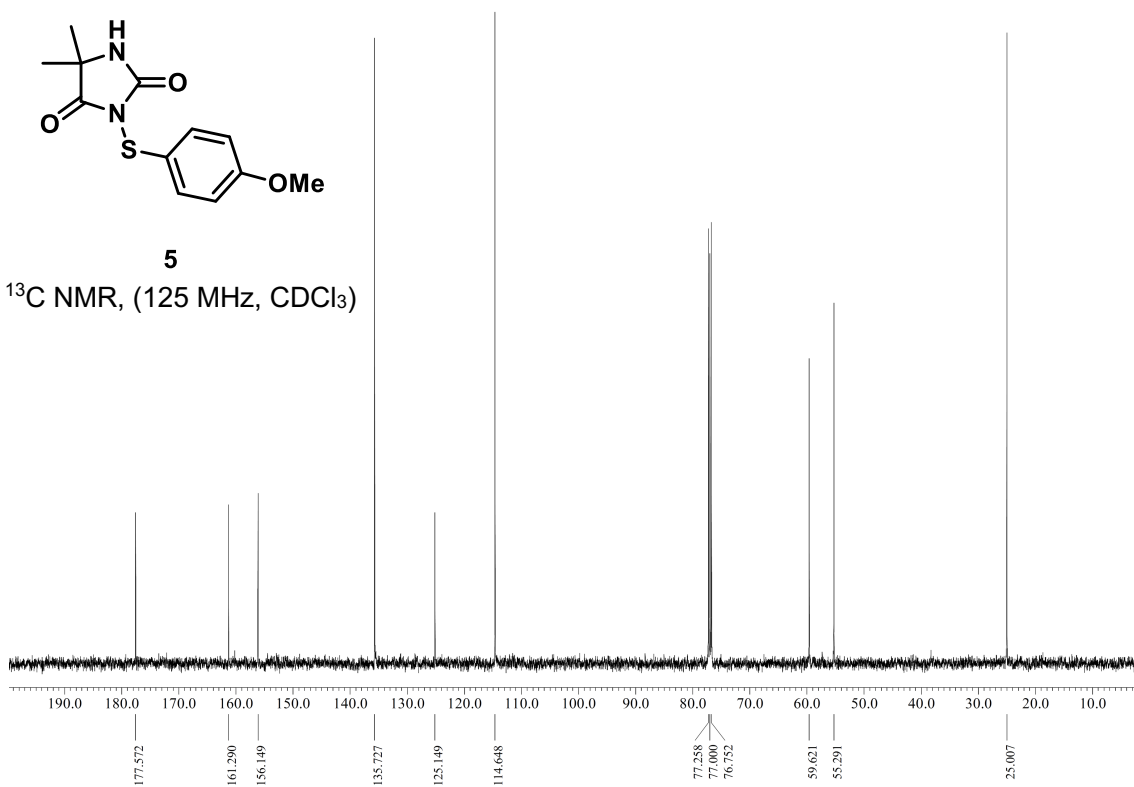

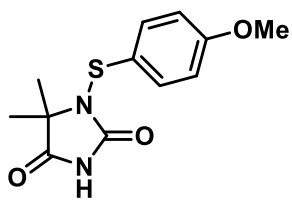

6

$^1\text{H}$  NMR, (500 MHz,  $\text{CDCl}_3$ )

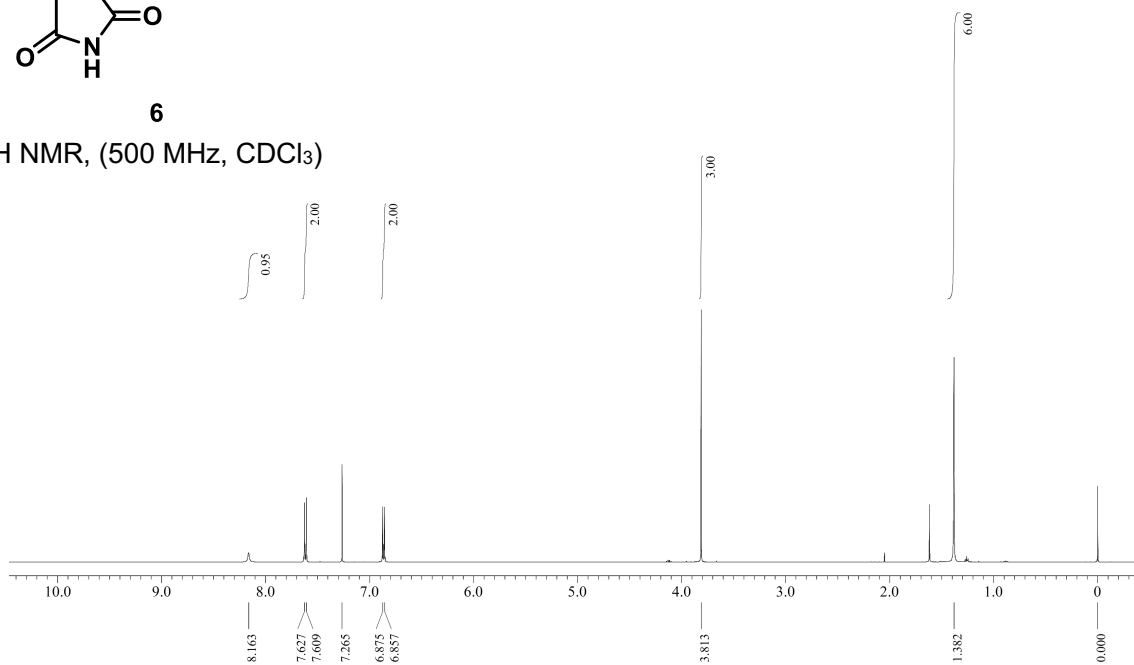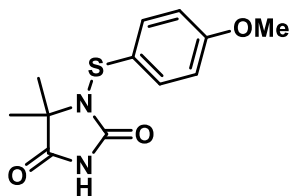

6

$^{13}\text{C}$  NMR, (125 MHz,  $\text{CDCl}_3$ )

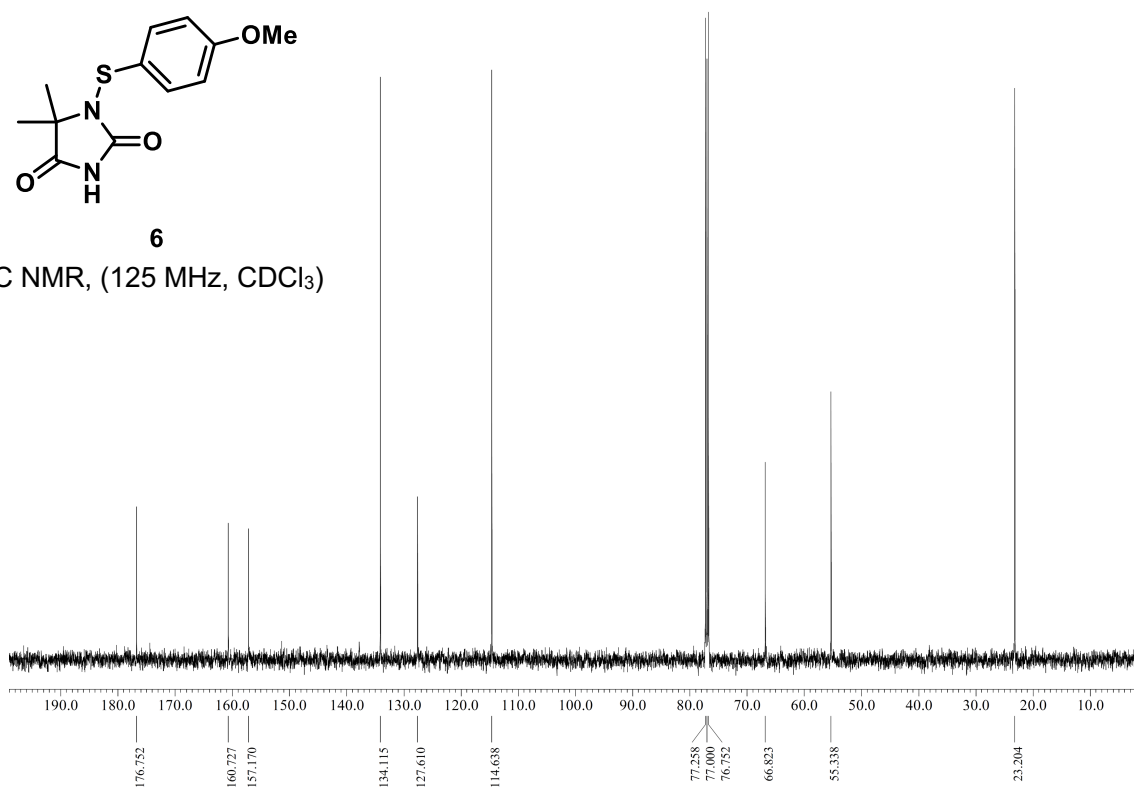

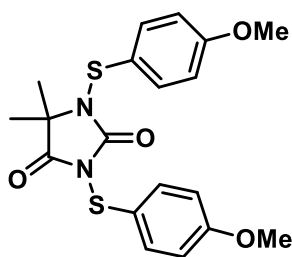

7

<sup>1</sup>H NMR, (500 MHz, CDCl<sub>3</sub>)

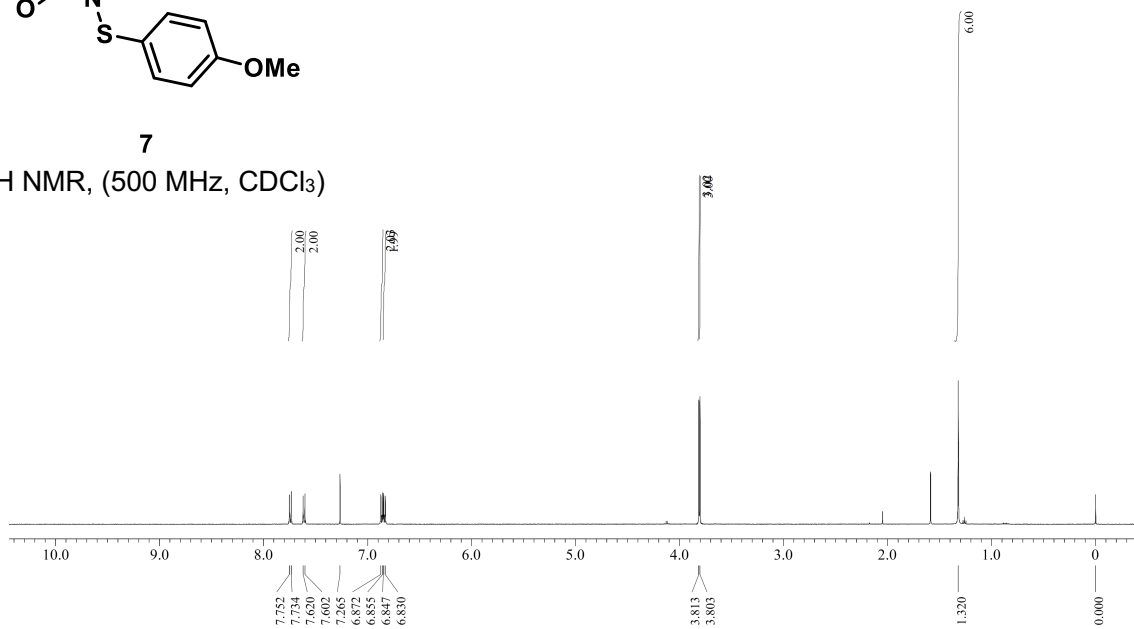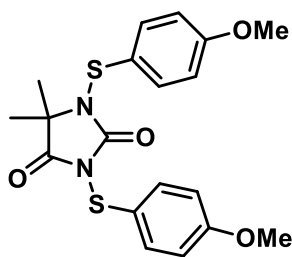

7

<sup>13</sup>C NMR, (125 MHz, CDCl<sub>3</sub>)

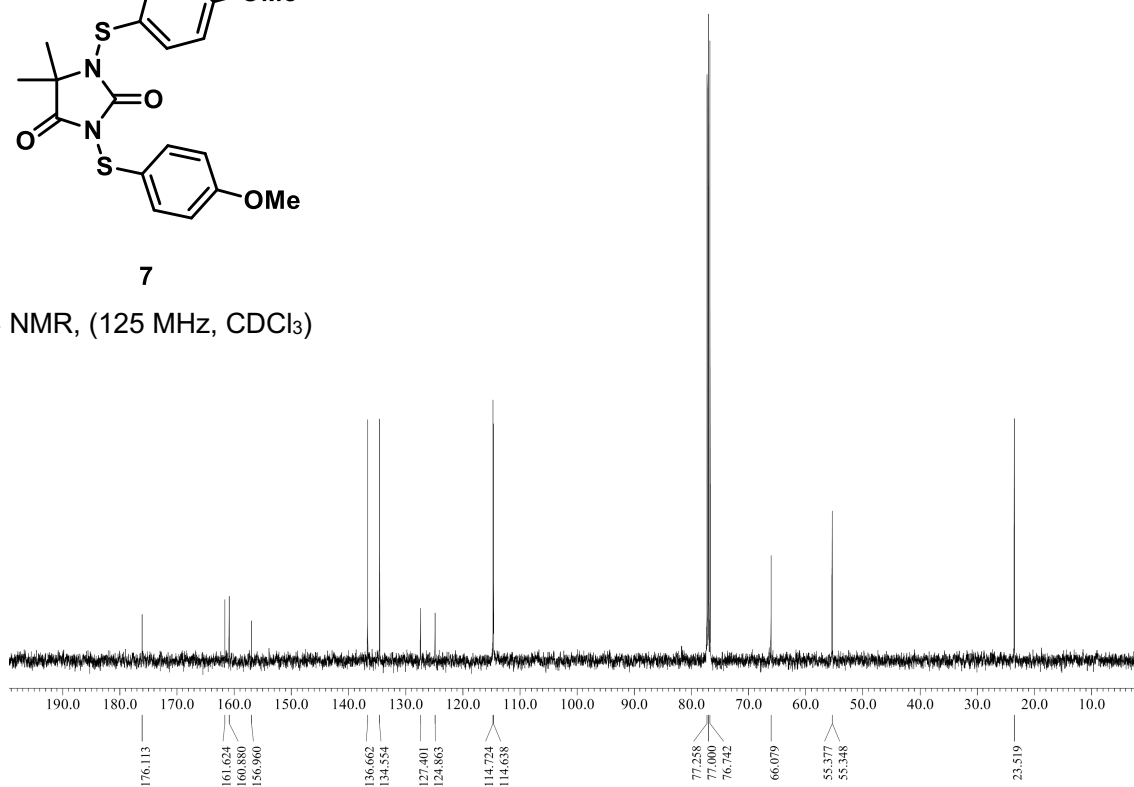

Supplement: Supplementary file 1 [file 15176726]
